# Supplementary material
Source: HighWire-hosted journal article supplement (https://bmjopen.bmj.com/content/14/3/e078479)
Supplement: inline-supplementary-material-1 [file inline-supplementary-material-1.pdf]

## Appendix A: Engaging People with Lived Experiences on Community Advisory Boards in Community-Based Participatory Research: Scoping Review Search Strategy

### EMBASE Search Strategy

Embase Classic+Embase <1947 to 2023 March 30>

- 1 participatory research/
- 2 participatory research\*.mp.
- 3 community-based participatory research\*.mp.
- 4 CBPR.mp.
- 5 action research/
- 6 action research\*.mp.
- 7 citizen science/
- 8 citizen science\*.mp.
- 9 participatory action research/
- 10 participatory action research\*.mp.
- 11 (public adj2 participat\*).mp. [mp=title, abstract, heading word, drug trade name, original title, device manufacturer, drug manufacturer, device trade name, keyword heading word, floating subheading word, candidate term word]
- 12 community participation/
- 13 (communit\* adj2 participat\*).mp. [mp=title, abstract, heading word, drug trade name, original title, device manufacturer, drug manufacturer, device trade name, keyword heading word, floating subheading word, candidate term word]
- 14 (public adj2 involvement\*).mp. [mp=title, abstract, heading word, drug trade name, original title, device manufacturer, drug manufacturer, device trade name, keyword heading word, floating subheading word, candidate term word]
- 15 (communit\* adj2 involvement\*).mp. [mp=title, abstract, heading word, drug trade name, original title, device manufacturer, drug manufacturer, device trade name, keyword heading word, floating subheading word, candidate term word]
- 16 1 or 2 or 3 or 4 or 5 or 6 or 7 or 8 or 9 or 10 or 11 or 12 or 13 or 14 or 15
- 17 community advisory board\*.mp.
- 18 advisory committee/
- 19 (advisor\* adj2 committee\*).mp. [mp=title, abstract, heading word, drug trade name, original title, device manufacturer, drug manufacturer, device trade name, keyword heading word, floating subheading word, candidate term word]
- 20 task force\*.mp.
- 21 (advisor\* adj2 board\*).mp. [mp=title, abstract, heading word, drug trade name, original title, device manufacturer, drug manufacturer, device trade name, keyword heading word, floating subheading word, candidate term word]
- 22 (advisor\* adj2 council\*).mp. [mp=title, abstract, heading word, drug trade name, original title, device manufacturer, drug manufacturer, device trade name, keyword heading word, floating subheading word, candidate term word]
- 23 (stakeholder\* adj2 board\*).mp. [mp=title, abstract, heading word, drug trade name, original title, device manufacturer, drug manufacturer, device trade name, keyword heading word, floating subheading word, candidate term word]
- 24 (stakeholder\* adj2 committee\*).mp. [mp=title, abstract, heading word, drug trade name, original title, device manufacturer, drug manufacturer, device trade name, keyword heading word, floating subheading word, candidate term word]

- 25 (communit\* adj2 committee\*).mp. [mp=title, abstract, heading word, drug trade name, original title, device manufacturer, drug manufacturer, device trade name, keyword heading word, floating subheading word, candidate term word]
- 26 (communit\* adj2 board\*).mp. [mp=title, abstract, heading word, drug trade name, original title, device manufacturer, drug manufacturer, device trade name, keyword heading word, floating subheading word, candidate term word]
- 27 (communit\* adj2 council\*).mp. [mp=title, abstract, heading word, drug trade name, original title, device manufacturer, drug manufacturer, device trade name, keyword heading word, floating subheading word, candidate term word]
- 28 (stakeholder\* adj2 council\*).mp. [mp=title, abstract, heading word, drug trade name, original title, device manufacturer, drug manufacturer, device trade name, keyword heading word, floating subheading word, candidate term word]
- 29 17 or 18 or 19 or 20 or 21 or 22 or 23 or 24 or 25 or 26 or 27 or 28
- 30 16 and 29 **882**

### MEDLINE Search Strategy

Ovid MEDLINE(R) ALL <1946 to March 30, 2023>

- 1 participatory research\*.mp.
- 2 Community-Based Participatory Research/
- 3 community-based participatory research\*.mp.
- 4 CBPR.mp.
- 5 action research\*.mp.
- 6 Citizen Science/
- 7 citizen science\*.mp.
- 8 participatory action research\*.mp.
- 9 (public adj2 participat\*).mp. [mp=title, book title, abstract, original title, name of substance word, subject heading word, floating sub-heading word, keyword heading word, organism supplementary concept word, protocol supplementary concept word, rare disease supplementary concept word, unique identifier, synonyms, population supplementary concept word, anatomy supplementary concept word]
- 10 Community Participation/
- 11 (communit\* adj2 participat\*).mp. [mp=title, book title, abstract, original title, name of substance word, subject heading word, floating sub-heading word, keyword heading word, organism supplementary concept word, protocol supplementary concept word, rare disease supplementary concept word, unique identifier, synonyms, population supplementary concept word, anatomy supplementary concept word]
- 12 (public adj2 involvement\*).mp. [mp=title, book title, abstract, original title, name of substance word, subject heading word, floating sub-heading word, keyword heading word, organism supplementary concept word, protocol supplementary concept word, rare disease supplementary concept word, unique identifier, synonyms, population supplementary concept word, anatomy supplementary concept word]
- 13 (communit\* adj2 involvement\*).mp. [mp=title, book title, abstract, original title, name of substance word, subject heading word, floating sub-heading word, keyword heading word, organism supplementary concept word, protocol supplementary concept word, rare disease supplementary concept word, unique identifier, synonyms, population supplementary concept word, anatomy supplementary concept word]
- 14 1 or 2 or 3 or 4 or 5 or 6 or 7 or 8 or 9 or 10 or 11 or 12 or 13
- 15 community advisory board\*.mp.
- 16 Advisory Committees/
- 17 (advisor\* adj2 committee\*).mp. [mp=title, book title, abstract, original title, name of substance word, subject heading word, floating sub-heading word, keyword heading word, organism supplementary

concept word, protocol supplementary concept word, rare disease supplementary concept word, unique identifier, synonyms, population supplementary concept word, anatomy supplementary concept word]

18 task force\*.mp.

19 (advisor\* adj2 board\*).mp. [mp=title, book title, abstract, original title, name of substance word, subject heading word, floating sub-heading word, keyword heading word, organism supplementary concept word, protocol supplementary concept word, rare disease supplementary concept word, unique identifier, synonyms, population supplementary concept word, anatomy supplementary concept word]

20 (advisor\* adj2 council\*).mp. [mp=title, book title, abstract, original title, name of substance word, subject heading word, floating sub-heading word, keyword heading word, organism supplementary concept word, protocol supplementary concept word, rare disease supplementary concept word, unique identifier, synonyms, population supplementary concept word, anatomy supplementary concept word]

21 (stakeholder\* adj2 board\*).mp. [mp=title, book title, abstract, original title, name of substance word, subject heading word, floating sub-heading word, keyword heading word, organism supplementary concept word, protocol supplementary concept word, rare disease supplementary concept word, unique identifier, synonyms, population supplementary concept word, anatomy supplementary concept word]

22 (stakeholder\* adj2 committee\*).mp. [mp=title, book title, abstract, original title, name of substance word, subject heading word, floating sub-heading word, keyword heading word, organism supplementary concept word, protocol supplementary concept word, rare disease supplementary concept word, unique identifier, synonyms, population supplementary concept word, anatomy supplementary concept word]

23 (communit\* adj2 committee\*).mp. [mp=title, book title, abstract, original title, name of substance word, subject heading word, floating sub-heading word, keyword heading word, organism supplementary concept word, protocol supplementary concept word, rare disease supplementary concept word, unique identifier, synonyms, population supplementary concept word, anatomy supplementary concept word]

24 (communit\* adj2 board\*).mp. [mp=title, book title, abstract, original title, name of substance word, subject heading word, floating sub-heading word, keyword heading word, organism supplementary concept word, protocol supplementary concept word, rare disease supplementary concept word, unique identifier, synonyms, population supplementary concept word, anatomy supplementary concept word]

25 (communit\* adj2 council\*).mp. [mp=title, book title, abstract, original title, name of substance word, subject heading word, floating sub-heading word, keyword heading word, organism supplementary concept word, protocol supplementary concept word, rare disease supplementary concept word, unique identifier, synonyms, population supplementary concept word, anatomy supplementary concept word]

26 (stakeholder\* adj2 council\*).mp. [mp=title, book title, abstract, original title, name of substance word, subject heading word, floating sub-heading word, keyword heading word, organism supplementary concept word, protocol supplementary concept word, rare disease supplementary concept word, unique identifier, synonyms, population supplementary concept word, anatomy supplementary concept word]

27 15 or 16 or 17 or 18 or 19 or 20 or 21 or 22 or 23 or 24 or 25 or 26

28 14 and 27 **1099**

## PsychINFO Search Strategy

APA PsycInfo <1806 to March Week 4 2023>

1 participatory research\*.mp.

2 community-based participatory research\*.mp.

3 CBPR.mp.

4 Action Research/

5 action research\*.mp.

6 citizen science\*.mp.

7 participatory action research\*.mp.

- 8 (public adj2 participat\*).mp. [mp=title, abstract, heading word, table of contents, key concepts, original title, tests & measures, mesh word]
- 9 (communit\* adj2 participat\*).mp. [mp=title, abstract, heading word, table of contents, key concepts, original title, tests & measures, mesh word]
- 10 (public adj2 involvement\*).mp. [mp=title, abstract, heading word, table of contents, key concepts, original title, tests & measures, mesh word]
- 11 Community Involvement/
- 12 (communit\* adj2 involvement\*).mp. [mp=title, abstract, heading word, table of contents, key concepts, original title, tests & measures, mesh word]
- 13 1 or 2 or 3 or 4 or 5 or 6 or 7 or 8 or 9 or 10 or 11 or 12
- 14 community advisory board\*.mp.
- 15 (advisor\* adj2 committee\*).mp. [mp=title, abstract, heading word, table of contents, key concepts, original title, tests & measures, mesh word]
- 16 task force\*.mp.
- 17 (advisor\* adj2 board\*).mp. [mp=title, abstract, heading word, table of contents, key concepts, original title, tests & measures, mesh word]
- 18 (advisor\* adj2 council\*).mp. [mp=title, abstract, heading word, table of contents, key concepts, original title, tests & measures, mesh word]
- 19 (stakeholder\* adj2 board\*).mp. [mp=title, abstract, heading word, table of contents, key concepts, original title, tests & measures, mesh word]
- 20 (stakeholder\* adj2 committee\*).mp. [mp=title, abstract, heading word, table of contents, key concepts, original title, tests & measures, mesh word]
- 21 (communit\* adj2 committee\*).mp. [mp=title, abstract, heading word, table of contents, key concepts, original title, tests & measures, mesh word]
- 22 (communit\* adj2 board\*).mp. [mp=title, abstract, heading word, table of contents, key concepts, original title, tests & measures, mesh word]
- 23 (communit\* adj2 council\*).mp. [mp=title, abstract, heading word, table of contents, key concepts, original title, tests & measures, mesh word]
- 24 (stakeholder\* adj2 council\*).mp. [mp=title, abstract, heading word, table of contents, key concepts, original title, tests & measures, mesh word]
- 25 14 or 15 or 16 or 17 or 18 or 19 or 20 or 21 or 22 or 23 or 24
- 26 13 and 25 **366**
